# Supplementary material for: Preparation of N-Doped Composite Shell Encapsulated Iron Nanoparticles and Their Magnetic, Adsorptive, and Photocatalytic Properties
Source: Hindawi journal article supplement (doi:10.1155/2017/7868121), 2017-01-01
Supplement: f1 [file 7868121.f1.docx]

**Supplementary Materials**

Preparation of N-doped composite shell encapsulated iron nanoparticles and their magnetic, adsorptive and photocatalytic properties

Caijing Shi,1 Lan Cui,2 Kui Lin,2 Qianjin Guo,2 Fan Zhang,1,# Fengxiang Hu,1 Sayyar Ali Shah,1,§ Xitao Wang 3, Xiaoping Chen,2 and Shen Cui1

*1 Department of Chemistry, School of Science, Tianjin University, Tianjin 300072, P. R. China*

*2 Center of Analysis, Tianjin University, Tianjin 300072, P. R. China*

*3 Department of Catalysis, School of Chemical Engineering and Technology, Tianjin University, Tianjin 300072, P. R. China*

# *Present address:**Tianjin Cement Industry Design and Research Institute Co., Ltd. Tianjin 300400, P. R. China*

§*Present address:**Department of Chemistry, Abdul Wali Khan University Mardan, Khyber Paktunkhwa, Pakistan*

*Correspondence should be addressed to Shen Cui;* [*cuishen@tju.edu.cn*](mailto:cuishen@tju.edu.cn)

**Fig. S1.** XRD pattern of the as-prepared anode.

**Fig. S1.** XRD pattern of the as-prepared anode (Co Kα). The diffraction peaks at about 30.91° and 50.54° are matched well with graphite carbon (PDF Card No. 75-2078). The peaks at 52.38° and 77.37° can be attributed to Fe (PDF Card No. 87-0721). The peaks at 42.07°, 49.09° and 71.92° can be ascribed to FeO (PDF Card No. 77-2355). The peaks at 35.08°, 41.40°, 67.37°,and 74.23° can be assigned to Fe3O4 (PDF Card No. 75-0033).

**Fig. S2.** TG and DSC curves of the as-prepared anode

**Fig. S2.** TG-DSC curves of the as-prepared anode. It is estimated from the TG curve that the Fe content in the product B is ca. 75.5 wt.%, The process of calculation for the Fe content in the anode is shown below.

**Calculation of Fe content in the as-prepared anode**

Primary weight of the sample of the as-prepared anode = 4.12 mg

The weight gain remained at 1100 °C was = 108.11 wt.%

Weight of the residue at 1100 °C = 4.12×108.11 % = 4.45 mg

Supposing the residue is Fe2O3.

Atomic weight of Fe = 55.85 amu

Atomic weight of oxygen= 16.00 amu

The weight of Fe in the residue = ×4.45 = 3.11 mg

Fe content in the as-prepared anode = ×100 wt.% = 75.5 wt.%

**S3. TEM images of the product C**


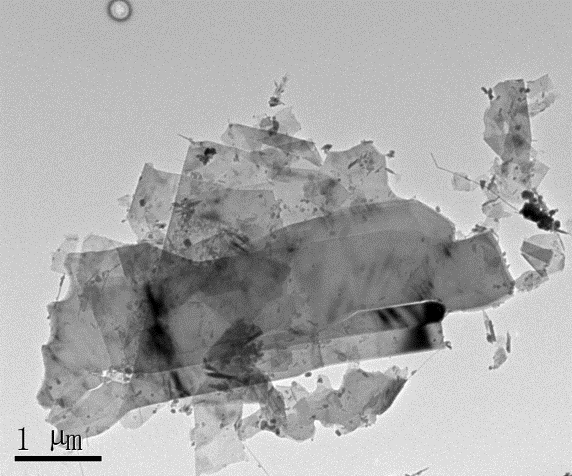

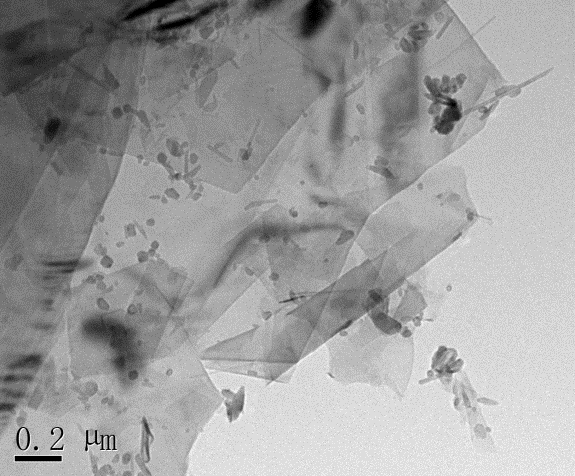


**(b)**

**(a)**

**Fig. S3.** TEM images of the product C at (a) low and (b) high magnifications. It is clearly shown that the product C mainly consists of nanosheets.

**S4. EDX spectrum of the N-doped CSEINPs**


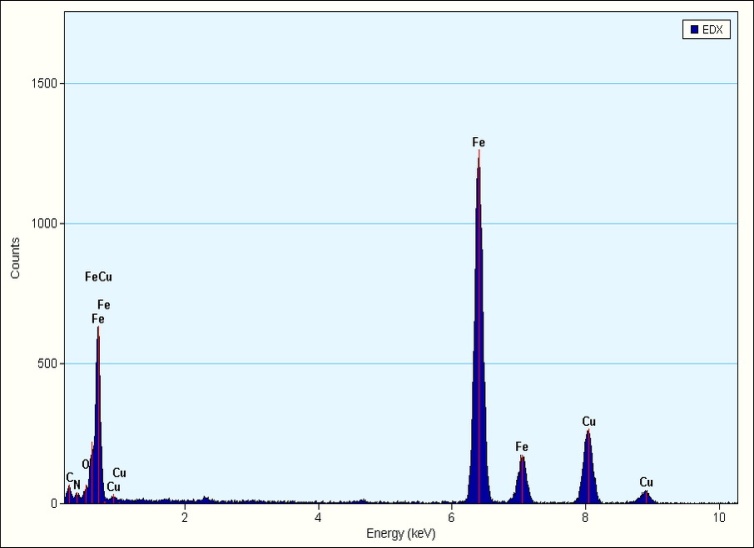


| **Element** | ***wt.*%** | ***at.*%** |
| --- | --- | --- |
| **C K** | 4.24 | 15.05 |
| **N K** | 3.44 | 10.46 |
| **O K** | 2.11 | 5.63 |
| **Fe K** | 90.21 | 68.87 |

**Fig. S4.** EDX spectrum of the region inside the white circle in Fig. 3(b) of the manuscript.

**S5. XRD patterns of the products (a) A, (b) D, and (c) E**

Fig. S5.XRD patterns of the products (a) A, (b) D, and (c) E. The XRD patterns show that the phase composition of these products includes graphitic carbon, Fe, Fe3C and Austenite CFe15.1.

**S6. TG-DSC curves of the products (a) A, (b) D, and (c) E**

**(a)**

**(b)**

**(c)**

**Fig. S6.** TG-DSC curves of the products (a) A, (b) D, and (c) E.It is estimated from the final weight gains of the TG curves that the Fe contents in A, D, and E are ca. 85.4 wt.%, 80.4 wt.%, 85.7 wt.%, respectively.

**S7. Full magnetic hysteresis loop of the product B**

**Fig. S7.** The full magnetic hysteresis loop of the product B at room temperature.

**S8. EDX spectrum of the N-doped CSEINPs after being used in the recycling test.**


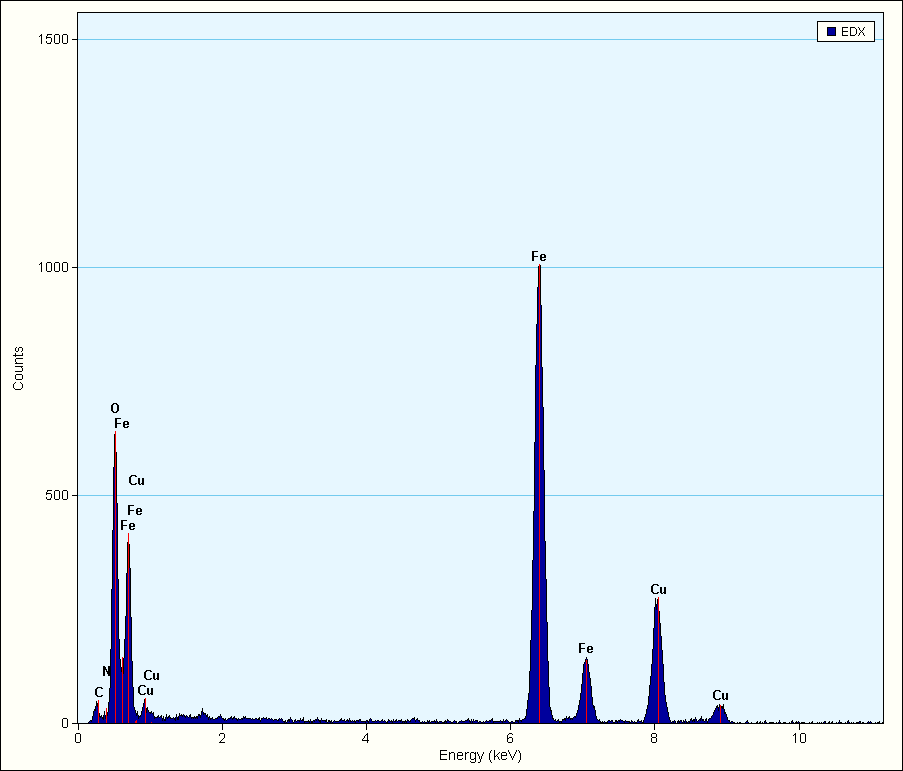


| **Element** | ***wt.*%** | ***at.*%** |
| --- | --- | --- |
| **C K** | 1.68 | 4.20 |
| **N K** | 1.23 | 2.64 |
| **O K** | 30.61 | 57.43 |
| **Fe K** | 66.47 | 35.73 |

**Fig. S8.** EDX spectrum of the region inside the red circle in Fig. 13(b) of the manuscript.
